# Supplementary material for: A Computer Simulation Study of Anatomy Induced Drift of Spiral Waves in the Human Atrium
Source: Biomed Res Int. 2015 Oct 26;2015:731386. doi: 10.1155/2015/731386 (PMC4637448; doi:10.1155/2015/731386)
Supplement: Supplementary file 1 — The supplementary material consists of 11 animations. The animations illustrate the movement of of scroll waves in realistic or idealised geometries. Each animation shows 60 s of simulated electrical activity in the realistic atria (animations S1 to S4), or in idealised geometries (animations S5 to S11). The spiral wave filament trajectory on the surface of each anatomical model is shown as a solid black line. The electrical wave's propagating front is shown as red whereas resting atrial tissue is shown as blue. Each frame in the animation was stroboscopically recorded as described in the main manuscript. [file 731386.f1.zip]

Archive with 11 entries (11 files):
- S3.avi
- S4.avi
- S5.avi
- S6.avi
- S7.avi
- S8.avi
- S9.avi
- S10.avi
- S11.avi
- S1.avi
- S2.avi
